# Supplementary material for: Medical Evidence of Human Rights Violations against Non-Arabic-Speaking Civilians in Darfur: A Cross-Sectional Study
Source: PubMed Central journal article supplement (PMC3317898; doi:10.1371/journal.pmed.1001198), 2012-04-03
Supplement: pmed.1001198.s001.pdf [file pmed.1001198.s001.pdf]

**Text S1. Supporting Information.** This coding sheet, with lists of standardized names and response options, was used to guide abstraction of data from the medical records (version Dec 7, 2010).

## **Socio-Demographic Variables**

1. Participant ID
2. Sex: 0 Male 1 Female
3. Pregnant at the time of the attack: 0 No 1 Yes -99 N/A (for men)
4. Day of reporting to the center (1-31)
5. Month of reporting to the center (1-12)
6. Year of reporting to the center (2004-2006)
7. Age (years)
8. Marital status: 0 Single 1 Married Free text: specify other
9. Number of wives -88 more than one but exact # unspecified  
-99 N/A (for women)
10. Number of children -88 more than one but exact # unspecified
11. Number of sons
12. Religion: 1 Muslim  
Free text: specify other religion
13. Tribe/Ethnicity: 1 Zaghawa  
2 Masalit (Massaleit)  
3 Fur  
4 Dago (Dajo)  
5 Meisseiria (Missiriya)  
6 Tamma  
7 Burno (Borno, Bornu)  
8 Erenga  
9 Tunjur  
10 Habbaniya (Habaniya)  
11 Rizeigat (Rizaygat, Rezeqat)  
12 Fallata (Fulani)  
13 Beni Halba (Bani Halba)  
14 Ta'isha (Ta'aisha)  
15 Tarjum  
16 Hawara  
17 Bargo  
18 Humur (Hammer)  
19 Marareit  
20 Burti  
21 Kamalti  
22 Meidoub  
23 Gimmir  
24 Shaigyya (Shaigiya)  
25 Jaalileen  
26 Danagila (Dangila)  
Free text: specify other tribe
14. Occupation: 1 Farmer  
2 Merchant  
3 Student/Pupil  
4 Shepherd  
5 Teacher  
Free text: specify other occupation
15. Place of residence: 1 South Darfur  
2 West Darfur  
3 North Darfur  
Free text: specify if other residence
16. Political affiliation (free text)

## **Characteristics of Incident that Led to Reported Injury**

17. Day of incident (1-31): *leave blank if day not indicated*
18. Month of incident (1-12): *leave blank if month not indicated*
19. Year of incident (2004-2006)
20. Time of incident (12-hour clock): *leave blank if exact time not indicated*
21. Time period of incident:           1 Ante meridiem A.M.  
                                                  2 Post meridiem P.M.
22. Location of incident: (Rural Council Boundaries)

### *North Darfur*

- 1 Malha
- 2 Malit & Sayeh
- 3 Kornî, Um Baru & Tina
- 4 Kutum Rural & Fato Borno
- 5 Al Sireaf & Saraf Omra
- 6 Kabkabiya & Jebel Si
- 7 Tawila & Korma
- 8 Al Fasher & Kuma
- 9 Dar al Salam
- 10 Um Kadada
- 11 Al Tawisha
- 12 Al Lait

### *West Darfur*

- 13 Kulbus
- 14 Seleia
- 15 Sirba
- 16 Kerenek
- 17 Masteri
- 18 Mornei
- 19 Beida
- 20 Habilah
- 21 For Baranga
- 22 Azoum
- 23 Abata
- 24 Zallingi Rural - Traige
- 25 Um Kher
- 26 Garseila-Delaige
- 27 Bundis
- 28 Mukjar
- 29 Um Dukhun

### *South Darfur*

- 30 Kass
- 31 Shataya
- 32 Sharq Gabal Mara
- 33 Malam
- 34 Abu Agura
- 35 Nyala
- 36 Balil
- 37 Yasin
- 38 Mahagriya
- 39 Shearia
- 40 Natiqa
- 41 Al Deain
- 42 Fardus
- 43 Asalaya
- 44 Abu Matariq

45 Abu Gabra  
 46 Adayla  
 47 Abu Karaynka  
 48 Kubum  
 49 Um Lubasa  
 50 Edd Al Fursan  
 51 Madkandi  
 52 Katayla  
 53 Antikayna  
 54 Tulus  
 55 Damsu  
 56 Nyimeri  
 57 Um Dafug  
 58 Rehed al Birdi  
 59 Girayda  
 60 Buram  
 61 Wad al-Ugam  
 62 Suntah-al  
 63 Guhayna-al  
 64 Guz-al  
 65 Radum-al  
 Free text: other location not specified in this list

23. Number of alleged perpetrators: *enter a number from 1-999*  
 -88 more than one but exact # unspecified
24. Affiliation of alleged perpetrators:  
 1 Janjaweed  
 3 Both Janjaweed and Sudanese government  
 4 Rebel soldier  
 5 Bandit (i.e., no specific affiliation identified)  
 6 Community authority  
 7 Community member (e.g., neighbor)  
 8 Other  
 -88 unknown or not specified
25. Military commander present:  
 0 No  
 1 Yes  
 -88 Unknown
26. Name of alleged perpetrator 1: *(spell name, rank)*  
 27. Name of alleged perpetrator 2: *(spell name, rank)*  
 28. Name of alleged perpetrator 3: *(spell name, rank)*  
 29. Name of alleged perpetrator 4: *(spell name, rank)*  
 30. Name of alleged perpetrator 5: *(spell name, rank)*  
 31. Name of alleged perpetrator 6: *(spell name, rank)*  
 32. Name of alleged perpetrator 7: *(spell name, rank)*  
 33. Name of alleged perpetrator 8: *(spell name, rank)*  
 34. Name of alleged perpetrator 9: *(spell name, rank)*  
 35. Name of alleged perpetrator 10: *(spell name, rank)*
36. Alleged perpetrator(s) reported to be defending themselves against attack 0 No 1 Yes  
 37. Alleged perpetrator(s) reported to be in armed conflict w/ militants 0 No 1 Yes  
 38. Alleged perpetrator(s) reported to be intoxicated 0 No 1 Yes

## **Types of Abuses Experienced Personally by Client**

39. Violence *personally* experienced by client 0 No 1 Yes

### *Physical Violence*

40. Blunt trauma: beating, whipping, slapping  
 41. Gunshot wound  
 42. Ground explosives: bombing, grenades, shrapnel  
 43. Aerial bombing  
 44. Other penetrating or perforating trauma: knife, spear

- 45. Crush injuries: smashing fingers
- 46. Extraction/amputation injuries: removal of fingers/teeth
- 47. Burns: cigarettes, heated instruments, scalding liquid
- 48. Electric shocks
- 49. Suffocation/asphyxiation: wet/dry methods, drowning, choking, chemical
- 50. Hanging/stretching/suspension
- 51. Chemical exposure: salt, chili pepper, gasoline, drugs

*Sexual Violence*

- 52. Unwanted sexual advances
- 53. Forced to undress
- 54. Unwanted touching: touching, kissing, grabbing, fondling
- 55. Insertion of foreign object into vagina/rectum
- 56. Attempted rape: assailant attempted rape but did not succeed
- 57. Rape (either anal or vaginal)
- 58. Gang rape: more than one assailant
- 59. (If gang rape): number of assailants:      *enter a number from 1-99*  
                                                                                                  *-88 more than one but exact # unspecified*
- 60. Forced prostitution

*Psychological Manipulations*

- 61. Verbal abuse, including mockery
- 62. Verbal abuse characterized by racial/ethnic slurs
- 63. Threats of sexual violence
- 64. Threats of physical torture/beatings
- 65. Threats against family
- 66. Threats of death
- 67. Performance of humiliating acts, violation of taboos (e.g., head shaven with unclean razor)
- 68. Forced witnessing of torture/atrocities inflicted on others

*Detainment*

- 69. Detained against will: kidnapped, held captive
- 70. Duration of detainment (in days) -- use fractions for hours
- 71. Forced to serve in military forces

*Conditions of Detainment*

- 72. Bound with rope, chains, or other restriction of movement
- 73. Forced standing
- 74. Small or overcrowded cell
- 75. Solitary confinement
- 76. Unhygienic conditions, infested surroundings
- 77. No access to toilet/bathing facilities
- 78. Cold showers, doused with cold water
- 79. Deprived of food
- 80. Deprived of water
- 81. Deprived of medical care
- 82. Sensory deprivation (e.g., complete darkness)
- 83. Exposure to extreme heat or cold
- 84. Exposure to bright light
- 85. Exposure to loud music

*Material Loss*

- 86. Destruction of crops
- 87. Destruction of home
- 88. Theft of livestock
- 89. Killing of livestock
- 90. Other type of violence experienced not specified (free text)
- 91. Was incident observed by other persons?      0 No  
                                                                                                  1 Yes  
                                                                                                  -88 Unknown/not specified

92. Narrative passage describing violence experienced by client (free text)

## Types of Abuses Witnessed by Client

93. Violence was witnessed by client: specify number of victims, 1-999  
-88 more than one but exact # unspecified  
Free text: specify other ("many people")

94. Was the witnessed violence associated with the primary event? 0 No  
1 Yes

### *Physical Violence*

- 95. Blunt trauma: beating, whipping, slapping
- 96. Gunshot wound
- 97. Ground explosives: bombing, grenades, shrapnel
- 98. Aerial bombing
- 99. Other penetrating or perforating trauma: knife, spear
- 100. Crush injuries: smashing fingers
- 101. Extraction/amputation injuries: removal of fingers/teeth
- 102. Burns: cigarettes, heated instruments, scalding liquid
- 103. Electric shocks
- 104. Suffocation/asphyxiation: wet/dry methods, drowning, choking, chemical
- 105. Hanging/stretching/suspension
- 106. Chemical exposure: salt, chili pepper, gasoline, drugs
- 107. Wilful killing (according to any of the above methods)

### *Sexual Violence*

- 108. Unwanted sexual advances
- 109. Forced to undress
- 110. Unwanted touching: touching, kissing, grabbing, fondling
- 111. Insertion of foreign object into vagina/rectum
- 112. Attempted rape: assailant attempted rape but did not succeed
- 113. Rape (either anal or vaginal)
- 114. Gang rape: more than one assailant
- 115. (If gang rape): number of assailants: enter a number from 1-99  
-88 more than one but exact # unspecified
- 116. Forced prostitution

### *Psychological Manipulations*

- 117. Verbal abuse, including mockery
- 118. Verbal abuse characterized by racial/ethnic slurs
- 119. Threats of sexual violence
- 120. Threats of physical torture/beating
- 121. Threats against family
- 122. Threats of death
- 123. Performance of humiliating acts, violation of taboos (e.g., head shaven with unclean razor)
- 124. Forced witnessing of torture/atrocities inflicted on others

### *Detainment*

- 125. Detained against will: kidnapped, held captive
- 126. Duration of detainment (in days) -- use fractions for hours
- 127. Forced to serve in military forces

### *Conditions of Detainment*

- 128. Bound with rope, chains, or other restriction of movement
- 129. Forced standing
- 130. Small or overcrowded cell
- 131. Solitary confinement
- 132. Unhygienic conditions, infested surroundings
- 133. No access to toilet/bathing facilities
- 134. Cold showers, doused with cold water

- 135. Deprived of food
- 136. Deprived of water
- 137. Deprived of medical care
- 138. Sensory deprivation (e.g., complete darkness)
- 139. Exposure to extreme heat or cold
- 140. Exposure to bright light
- 141. Exposure to loud music

*Material Loss*

- 142. Destruction of crops
- 143. Destruction of home
- 144. Theft of livestock
- 145. Killing of livestock
- 146. Other type of violence witnessed not specified (free text)
- 147. Narrative passage describing violence witnessed by client (free text)

*Other Miscellaneous Data*

- 148. Perceived reason for violence: Suspicion of being a rebel 0 No 1 Yes
- 149. Perceived reason for violence: Suspicion of being a rebel supporter 0 No 1 Yes
- 150. Perceived reason for violence: Suspicion of political activity 0 No 1 Yes
- 151. Perceived reason for violence: Suspicion of being a traitor 0 No 1 Yes
- 152. Perceived reason for violence: Race/tribe/religion 0 No 1 Yes
- 153. Perceived reason for violence: Other (free text)
- 154. Previous arrest/detention: 0 No 1 Yes
- 155. Prior torture/mistreatment: 0 No 1 Yes
- 156. How client came to Amel Center:
  - 1 Self-referral
  - 2 Referred by friend/relative
  - 3 Brought to center by friend/relative
  - 4 Brought to center by staff
  - 5 Other
- 157. Assistance: Medical care 0 No 1 Yes
- 158. Assistance: Legal services 0 No 1 Yes
- 159. Referral: Psychiatry 0 No 1 Yes
- 160. Referral: Gynecology 0 No 1 Yes

*Sequelae of Incident*

- 161. Hospitalization required: 0 No 1 Yes
- 162. Symptoms: Chronic (non-pelvic) Pain 0 No 1 Yes
- 163. Symptoms: Chronic Pelvic Pain 0 No 1 Yes
- 164. Symptoms: Headache 0 No 1 Yes
- 165. Symptoms: Problems with vision 0 No 1 Yes
- 166. Symptoms: Problems with hearing 0 No 1 Yes
- 167. Symptoms: Numbness 0 No 1 Yes
- 168. Symptoms: Weakness 0 No 1 Yes
- 169. Symptoms: Insomnia 0 No 1 Yes
- 170. Symptoms: Hallucinations 0 No 1 Yes
- 171. Symptoms: Depressed mood 0 No 1 Yes
- 172. Symptoms: Flashbacks 0 No 1 Yes
- 173. Symptoms: Other (free text)
- 174. Signs: Wounds or scars 0 No 1 Yes
- 175. Signs: Swelling 0 No 1 Yes
- 176. Signs: Decreased visual acuity 0 No 1 Yes
- 177. Signs: Hearing loss/impairment 0 No 1 Yes
- 178. Signs: Peripheral numbness 0 No 1 Yes
- 179. Signs: Tremor 0 No 1 Yes
- 180. Signs: Broken or fractured bones 0 No 1 Yes
- 181. Signs: Functional disability 0 No 1 Yes
- 182. Signs: Sexually transmitted disease 0 No 1 Yes
- 183. Signs: Genital trauma 0 No 1 Yes
- 184. Signs: Other (free text)

(If client was exposed to sexual violence)

|                                                          |      |       |             |
|----------------------------------------------------------|------|-------|-------------|
| 185. (If not previously with child) Became pregnant:     | 0 No | 1 Yes | -88 Unknown |
| 186. (If previously with child) Miscarriage or abortion: | 0 No | 1 Yes |             |

Prognosis, as Determined by Treating Clinician (CHOOSE ONE ONLY)

|                                                             |      |       |
|-------------------------------------------------------------|------|-------|
| 187. Full recovery:                                         | 0 No | 1 Yes |
| 188. Partial recovery with residual physical disability:    | 0 No | 1 Yes |
| 189. Partial recovery with residual psychiatric disability: | 0 No | 1 Yes |

## **Medical Evaluation of Signs and Symptoms**

**CLINICAN: Please review the medical record and then come to an overall assessment to answer the following two questions:**

190. Does the medical record contain a level of detail sufficient to enable you to determine whether the documented signs and symptoms are consistent with the allegations of abuse?

Yes

No → Skip to end

191. (If the medical record contains sufficient detail) How consistent are the signs and symptoms with the allegations of abuse?

Not Related to Alleged Abuse (NR)

Not Consistent With Alleged Abuse (NCW)

Consistent With Alleged Abuse (CW)

Highly Consistent With Alleged Abuse (HCW)

Virtually Diagnostic Of Alleged Abuse (VDO)
